# Supplementary material for: Structure of the mouse acidic amino acid decarboxylase GADL1
Source: PubMed Central journal article supplement (PMC5947694; doi:10.1107/s2053230x17017848), 2018-01-01
Supplement: f-74-00065-sup2.pdf [file f-74-00065-sup2.pdf]

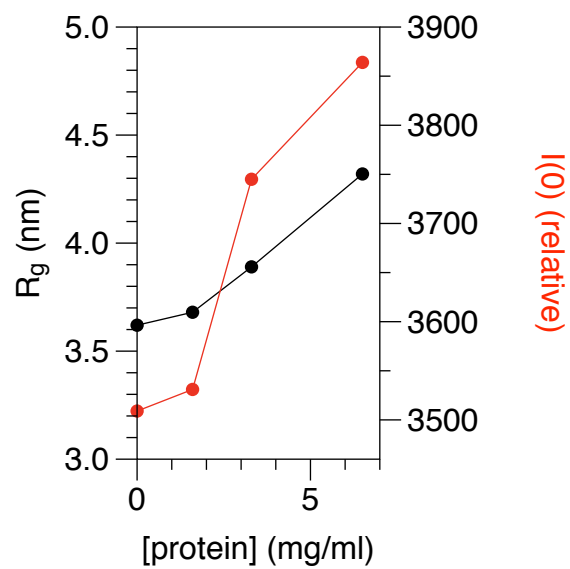

Supplementary Figure 1.  $R_g$  and  $I(0)$  as a function of protein concentration in the SAXS experiment. The dataset extrapolated to zero concentration and used in all the analyses is included.
